# Enhanced Detection of Cervical Cancer and Precancer Through Use of Imaged Liquid-Based Cytology in Routine Cytology and HPV Cotesting

R. Marshall Austin, MD, PhD,<sup>1</sup> Agnieszka Onisko, PhD,<sup>1,2</sup> and Chengquan Zhao, MD<sup>1</sup>

From the <sup>1</sup>Department of Pathology, University of Pittsburgh Medical Center, Pittsburgh, PA; and <sup>2</sup>Faculty of Computer Science, Bialystok University of Technology, Bialystok, Poland.

**Key Words:** Cervical cancer screening; Risk assessment; Cotesting; HPV; Imaged liquid-based cytology

*Am J Clin Pathol* November 2018;150:385-392

DOI: 10.1093/AJCP/AQY114

## ABSTRACT

**Objectives:** Cervical screening strives to prevent cervical cancer (CxCa), minimizing morbidity and mortality. Most large US reports on cytology and human papillomavirus (HPV) cotesting of women aged 30 years and older are from one laboratory, which used conventional Papanicolaou (Pap) smears from 2003 to 2009.

**Methods:** We quantified detection of CxCa and precancer (cervical intraepithelial neoplasia 3/adenocarcinoma in situ [CIN3/AIS]) in 300,800 cotests at Magee Womens Hospital since 2005. Screening histories preceding CxCa and CIN3/AIS diagnoses were examined to assess the contribution of cytology and HPV testing. Cotesting utilized Food and Drug Administration-approved imaged liquid-based cytology (LBC) and from-the-vial HPV tests.

**Results:** LBC identified more women subsequently diagnosed with CxCa and CIN3/AIS than HPV testing. HPV-negative/cytology-positive results preceded 13.1% of CxCa and 7.2% of CIN3/AIS diagnoses.

**Conclusions:** LBC enhanced cotesting detection of CxCa and CIN3/AIS to a greater extent than previously reported with conventional Pap smear and HPV cotesting.

Human papillomavirus (HPV) and Papanicolaou (Pap) cotesting is currently the preferred cervical screening method for women 30 years and older in consensus guidelines of the American Cancer Society, the American Society for Colposcopy and Cervical Pathology, the American Society for Clinical Pathology, and the American College of Obstetricians and Gynecologists.<sup>1,2</sup> Several very large US clinical datasets have now been published documenting the performance of cotesting in routine cervical screening and assessing the follow-up risk among screened women for histopathologic diagnoses of cervical high-grade intraepithelial lesions and invasive cervical cancer (CxCa).<sup>3-6</sup> These large-scale analyses have almost exclusively come from a single large laboratory, Kaiser Permanente Northern California (KPNC). At KPNC, over 1,200,000 women aged 30 years and older have, since 2003, undergone triennial cervical cotesting.<sup>3,5,6</sup> This laboratory, however, has followed a number of cervical screening practices that are unusual in the United States. First, in relying exclusively on the conventional Pap smear until 2009, KPNC may have been the last large US system to adopt liquid-based cytology (LBC).<sup>7</sup> To the best of our knowledge, only the US prison system now continues to rely largely on the conventional Pap smear. Furthermore, KPNC has collected Pap and HPV specimens as two separate specimens rather than utilizing from-the-vial HPV testing as recommended by the Food and Drug Administration (FDA) in clinical trials.<sup>6,8</sup> Apart from the KPNC reports, only a single very large nationwide study from a Quest Diagnostics database of 8.6 million patients has reported cotesting results utilizing

FDA-approved LBC and from-the-vial HPV cotesting.<sup>4</sup> Because the KPNC studies<sup>6</sup> have questioned the contribution of cytology to detection by cotesting of CxCa and precancer, we decided to analyze our own extended clinical experience with cotesting in a large academic women's hospital laboratory utilizing the most widely employed FDA-approved LBC methods and FDA-approved from-the-vial HPV cotesting.

## Materials and Methods

### Magee-Womens Hospital Data

This study analyzed cervical screening data collected over a period of almost 13 years, between January 2005 and August 2017, at Magee-Womens Hospital (MWH) of University of Pittsburgh Medical Center (UPMC). This database reflects cervical screening test results generated from widely used FDA-approved cervical screening technologies, including LBC using the ThinPrep Pap test<sup>9</sup> (Hologic Corp, Bedford, MA), computer-assisted LBC imaging using the ThinPrep Imaging System<sup>10</sup> (Hologic Corp, Bedford, MA), and from-the-PreservCyt vial testing for the presence of high-risk HPV (hrHPV) using either the Digene Hybrid Capture 2 HPV test<sup>11</sup> (until May 2013) (Qiagen Corp, Gaithersburg, MD), the Cervista HR HPV test<sup>12</sup> (June 2013 to May 2015) (Hologic Corp, Madison, WI), or the Aptima HPV test<sup>13</sup> (since June 2015) (Hologic/Gen-Probe, San Diego, CA). Cytology results were reported utilizing the 2001 Bethesda System (TBS).<sup>14</sup> Abnormal or "positive" cytology results were considered to be all Pap tests reporting epithelial cell abnormalities at the level of atypical squamous cells of undetermined significance (ASC-US) or a more severe cytologic abnormality.

In the MWH database there were 270,263 women aged 30 years and older with 748,947 LBC test results, and 300,800 (40.2%) of these LBC specimens also had from-the-vial hrHPV test results. Around 8.8% of the LBC test results (66,045) were followed by gynecological histopathologic evaluations of cervical tissue specimens. The MWH database also included clinical information such as history of infections, cancers, use of contraception, menstrual history, and HPV vaccine status. In this study we focused our analysis on women aged 30 years and older who had at least one available Pap and HPV cotest result. There were 300,800 cotest results from 186,000 patients. These screening test results preceded histopathologic diagnoses of 129 invasive CxCas and 632 histopathologic diagnoses of high-grade cervical intraepithelial lesions at the level of either cervical intraepithelial

neoplasia 3 (CIN3) or adenocarcinoma in situ (AIS). To facilitate comparison, we have reported our cotesting data in a format similar to that presented recently in the largest and most recent cotesting publication from KPNC.<sup>6</sup>

MWH cervical screening cotesting data were also analyzed using the Pittsburgh Cervical Cancer Screening Model (PCCSM).<sup>15-18</sup> This model is a dynamic Bayesian network constructed in GeNIe and SMILE (Structural Modeling, Inference, and Learning Engine), a development environment for creating and reasoning in graphical probabilistic models developed at the Decision Systems Laboratory, University of Pittsburgh (<http://www.bayesfusion.com>). The PCCSM was built based on expert knowledge and the ongoing collection of follow-up data from over 13 years of practice experience at MWH-UPMC. The continuously updated model includes CxCa screening test results, history of contraception, menstrual history, demographics, and the results of gynecological surgical procedures. The PCCSM model allows for quantitative risk stratification of patients for development over varying periods of follow-up time for selected diagnostic endpoints such as biopsy-proven cervical precancer or cervical invasive cancer, all based on MWH-UPMC system data.

## Results

### Cotesting Data Preceding Cervical Invasive Cancer and Cervical Precancer Diagnoses

We first analyzed cotesting data preceding invasive CxCa and CIN3/AIS diagnoses. **Table 1** shows all HPV and cytology cotest results preceding invasive CxCa diagnoses, both overall and broken down according to specific tumor histopathology, ie, squamous carcinomas, adenocarcinoma or adenosquamous carcinoma, and other cervical carcinomas. There were 198 cotest results preceding 129 CxCas; 76.3% of these preceding cotest results were HPV positive and 83.3% were cytology positive (ASC-US positive); 89.4% of all cotest results preceding CxCa diagnoses were either HPV positive or cytology positive.

**Table 2** shows all HPV and cytology cotest results preceding cervical precancer diagnoses of CIN3 and/or AIS, both overall and broken down according to specific histopathology, ie, CIN3 and AIS. There were 1,000 cotest results preceding 632 CIN3/AIS diagnoses; 86.7% of these results were HPV positive and 91.0% were cytology positive (ASC-US positive); 93.9% of all cotest results preceding CIN3/AIS diagnoses were either HPV positive or cytology positive.

**Table 3** shows HPV and cytology cotest results performed less than 12 months preceding histopathologic

**Table 1**  
High-Risk Human Papilloma Virus and Cytology Cotesting Results Preceding Invasive Cervical Cancer Diagnoses, Both Overall and by Specific Histopathology: SCC, ADC, and Other Cervical Carcinomas

| Histopathology | Cotesting Results Prior to Diagnoses, No. (%) |            |            |            |            |           |           |           | P <sup>a</sup> |
|----------------|-----------------------------------------------|------------|------------|------------|------------|-----------|-----------|-----------|----------------|
|                | Total                                         | HPV+       | Pap+       | Any+       | HPV+ Pap+  | HPV+ Pap- | HPV- Pap+ | HPV- Pap- |                |
| All cancers    | 198 (100)                                     | 151 (76.3) | 165 (83.3) | 177 (89.4) | 139 (70.2) | 12 (6.1)  | 26 (13.1) | 21 (10.6) | .0828          |
| SCC            | 96 (100)                                      | 74 (77.1)  | 89 (92.7)  | 90 (93.8)  | 73 (76.0)  | 1 (1.0)   | 16 (16.7) | 6 (6.3)   | .0025          |
| ADC            | 93 (100)                                      | 71 (76.3)  | 68 (73.1)  | 79 (84.9)  | 60 (64.5)  | 11 (11.8) | 8 (8.6)   | 14 (15.2) | .6157          |
| Other          | 9 (100)                                       | 6 (66.7)   | 8 (88.9)   | 8 (88.9)   | 6 (66.7)   | 0 (0.0)   | 2 (22.2)  | 1 (11.1)  |                |

ADC, adenocarcinoma or adenosquamous carcinoma; HPV, human papillomavirus; Pap, Papanicolaou test; SCC, squamous cell carcinoma.

<sup>a</sup>Two-sided *P* values comparing HPV tests with cytology were based on *Z* scores.<sup>6</sup>

**Table 2**  
High-Risk Human Papilloma Virus and Cytology Cotesting Results Preceding Precancer Diagnoses, Both Overall and by Specific Histopathology: CIN3 and AIS

| Histopathology | Cotesting Results Prior to Diagnoses, No. (%) |            |            |            |            |           |           |           | P <sup>a</sup> |
|----------------|-----------------------------------------------|------------|------------|------------|------------|-----------|-----------|-----------|----------------|
|                | Total                                         | HPV+       | Pap+       | Any+       | HPV+ Pap+  | HPV+ Pap- | HPV- Pap+ | HPV- Pap- |                |
| All precancers | 1,000 (100)                                   | 867 (86.7) | 910 (91.0) | 939 (93.9) | 838 (83.8) | 29 (2.9)  | 72 (7.2)  | 61 (6.1)  | .0023          |
| CIN3           | 845 (100)                                     | 747 (88.4) | 785 (92.9) | 803 (95.0) | 729 (86.3) | 18 (2.1)  | 56 (6.6)  | 42 (5.0)  | .0015          |
| AIS            | 155 (100)                                     | 120 (77.4) | 125 (80.6) | 136 (87.7) | 109 (70.3) | 11 (7.1)  | 16 (10.3) | 19 (12.3) | .4892          |

AIS, adenocarcinoma in situ; CIN3, cervical intraepithelial neoplasia 3; HPV, human papillomavirus; Pap, Papanicolaou test.

<sup>a</sup>Two-sided *P* values comparing HPV tests with cytology test were based on *Z* scores.<sup>6</sup>

invasive CxCa or cervical precancer (CIN3/AIS) diagnoses compared to HPV and Pap cotest results performed more than 12 months prior to the same histopathologic diagnoses. Cotesting results performed less than 12 months prior to CxCa or CIN3/AIS diagnoses were more likely to be positive (both HPV positive and/or cytology positive) than cotest results performed 12 or more months before the same histopathologic diagnoses. Abnormal cytology results were more likely than HPV-positive results to be recorded prior to either CxCa (90.8% vs 84.4%) or cervical precancer (97.9% vs 95.9%) diagnoses when cotesting was performed less than 12 months prior to diagnosis. When cotesting was performed 12 or more months before the CxCa or CIN3/AIS diagnoses, abnormal cytology results were also more likely than HPV-positive results prior to either CxCa (74.2% vs 66.3%) or cervical precancer (81.3% vs 73.8%).

#### Distribution of Cotesting Results Prior to Cervical Cancer or Cervical Precancer Diagnoses by Time Period

**Figure 1** shows cotesting results prior to histopathologic CxCa or CIN3/AIS diagnoses by time period prior to histopathologic diagnosis, 0 to 0.5 years (6 months) prior to diagnosis, 0.5 years to 1 year prior, 1 to 2 years prior, 3 to 4 years prior, 4 to 5 years prior, 5 to 6 years prior, and more than 6 years prior. Prior cotesting results are shown as either HPV positive/Pap positive (red), HPV positive/Pap negative (orange), HPV negative/Pap positive (green), or HPV negative/Pap negative (blue).

**Figure 2** shows PCCSM projections for 5-year cumulative risk of CxCa associated with various MWH cotest

results, including each separate TBS cytology category shown along with either HPV-positive or HPV-negative cotest results. HPV-negative cytology-positive (abnormal) document CxCa risk only detectable utilizing the cytology component of cotesting.

#### Discussion

Cytology findings in this study were significantly different from those reported in large cotesting studies from KPNC.<sup>3,5-7</sup> We report here that in cotested patients aged 30 years or older, more CxCas and CIN3/AIS diagnoses were detected with LBC than with FDA-approved from-the-LBC vial HPV testing, whereas KPNC investigators reported that HPV cotesting along with large-scale use of conventional Pap smears identified more women subsequently diagnosed with CxCa and precancer.<sup>6</sup> As noted above, KPNC has employed several cervical screening practices that are unusual in the United States and which could be related to our different findings in cotested patients. We believe that the exclusive use at KPNC of conventional Pap smears from 2003 to 2009<sup>7</sup> deserves the most scrutiny. Numerous large datasets comparing high-grade squamous intraepithelial lesion and CxCa detection rates utilizing LBC vs conventional Pap smears have consistently documented increased detection of significant abnormalities with LBC.<sup>19-23</sup> Enhanced detection of abnormalities with LBC has been attributed to both increased harvesting of cells from Pap collection devices and the interpretive

**Table 3**  
**High-Risk Human Papilloma Virus and Cytology Cotesting Results Less Than 12 Months vs 12 or More Months Preceding Invasive Cervical Cancer or Cervical Precancer Diagnoses**

| Histopathology | Cotesting Results Prior to Diagnoses, No. (%) |            |            |            |            |           |           |           | P <sup>a</sup> |
|----------------|-----------------------------------------------|------------|------------|------------|------------|-----------|-----------|-----------|----------------|
|                | Total                                         | HPV+       | Pap+       | Any+       | HPV+ Pap+  | HPV+ Pap- | HPV- Pap+ | HPV- Pap- |                |
| CxCa           |                                               |            |            |            |            |           |           |           |                |
| <12 mo         | 109 (100)                                     | 92 (84.4)  | 99 (90.8)  | 103 (94.5) | 88 (80.7)  | 4 (3.7)   | 11 (10.1) | 6 (5.5)   | .1517          |
| ≥12 mo         | 89 (100)                                      | 59 (66.3)  | 66 (74.2)  | 74 (83.1)  | 51 (57.3)  | 8 (9.0)   | 15 (16.9) | 15 (16.9) | .249           |
| CIN3/AIS       |                                               |            |            |            |            |           |           |           |                |
| <12 mo         | 584 (100)                                     | 560 (95.9) | 572 (97.9) | 581 (99.5) | 551 (94.3) | 9 (1.5)   | 21 (3.6)  | 3 (0.5)   | .0486          |
| ≥12 mo         | 416 (100)                                     | 307 (73.8) | 338 (81.3) | 358 (86.1) | 287 (69.0) | 20 (4.8)  | 51 (12.3) | 58 (13.9) | .0095          |

AIS, adenocarcinoma in situ; CIN3, cervical intraepithelial neoplasia 3; CxCa, cervical cancer; Pap, Papanicolaou test; HPV, human papillomavirus.

<sup>a</sup>Two-sided *P* values comparing HPV tests with cytology were based on *Z* scores<sup>6</sup>

advantage of immediate wet fixation,<sup>24</sup> as well as the opportunity to perform adjunctive molecular testing from residual LBC vial fluids. Although some still question the advantages of LBC based on international trials in two laboratories relatively inexperienced with the LBC method and lacking clearly documented LBC proficiency,<sup>25,26</sup> clinical trials in the more tightly quality controlled UK cervical screening system have documented a significantly enhanced performance with LBC compared with conventional cytology.<sup>27</sup> Preferential prevention of incident CxCas was also documented with LBC in the UK Artistic trial in which all CxCas diagnosed 2.5 to 8 years after the start of the trial were detected in the HPV arm of the trial compared to no CxCas detected during the same time period in the LBC arm.<sup>28</sup> European trials in Holland, Italy, and Sweden using the conventional Pap smear showed the opposite findings, with HPV testing preventing more CxCas than conventional smears.<sup>28</sup>

This study also highlights the significance of the length of time before CxCa and CIN3/AIS diagnoses in declines in cervical screening test performance (Figure 1). In spite of ongoing controversy about the safety of lengthened screening intervals,<sup>29</sup> current guidelines continue to suggest 5-year screening intervals for most patients after “double-negative” cytology and HPV cotest results.<sup>1,2</sup> Both this study and KPNC findings<sup>6</sup> document that cytology and HPV detection rates prior to CxCa and CIN3/AIS diagnoses decline substantially when testing was more than 12 months before diagnosis. While HPV-positive rates more than 12 months before CxCa diagnoses were similar at KPNC (62.8%)<sup>6</sup> and MWH (66.3%) (Table 3), abnormal cytology rates more than 12 months before CxCa were markedly different at KPNC (28.7%)<sup>6</sup> and MWH (74.2%) (Table 3). HPV detection rates decline progressively as time before CxCa diagnoses increases,<sup>30</sup> most likely due to smaller lesional size and increased difficulties in sampling lesional cells. In European clinical trials, baseline HPV-negative rates

in women developing incident CxCa 2.5 to 8 years after the start of the trials rose to 42%.<sup>28</sup> These rarely acknowledged data are not reassuring in supporting lengthened screening intervals of 5 to 10 years now being employed in some programs.<sup>31</sup> Even KPNC and the National Cancer Institute coinvestigators recently acknowledged “one of the barriers to adopting HPV testing into routine practice is simply a lack of long-term, longitudinal data on safety”.<sup>32</sup>

Data in this study confirm that local cytology performance can significantly impact the contribution of cytology to cotesting and detection of significant cervical lesions. In addition to the advantages of LBC over conventional Pap smear cytology described earlier, acknowledgement needs to be made that LBC can be performed suboptimally as well. We have previously reported verification bias-adjusted (VBA) sensitivity for LBC in the detection of histopathologic CIN2/3/AIS/CxCa lesions as high as 93%.<sup>33</sup> In contrast, the four large laboratories participating in the cobas HPV test (Roche Molecular Diagnostics, Pleasanton, CA) ATHENA trials recorded clearly suboptimal cytology performance with VBA CIN3-positive age-stratified sensitivity at only 27% to 42%.<sup>30</sup> Even among these four laboratories, VBA-adjusted sensitivity varied significantly.<sup>34</sup> MWH has long employed an approach to cervical screening that we refer to as Cervical Cancer Audit-Based Screening,<sup>35,36</sup> one in which abnormal immature metaplastic squamous cells and atypical glandular cells, often seen in only small numbers in retrospective audits of CxCa cases, are the specific emphasis of prospective screening. Conservative low-volume screening by cytotechnologists and intensive ongoing staff education are essential parts of this approach.<sup>33,35</sup>

Data in this study are also relevant to the role of cotesting in detection of difficult-to-prevent cervical adenocarcinomas.<sup>37</sup> KPNC data have previously emphasized the significance of HPV-positive/cytology-negative results in detection of endocervical



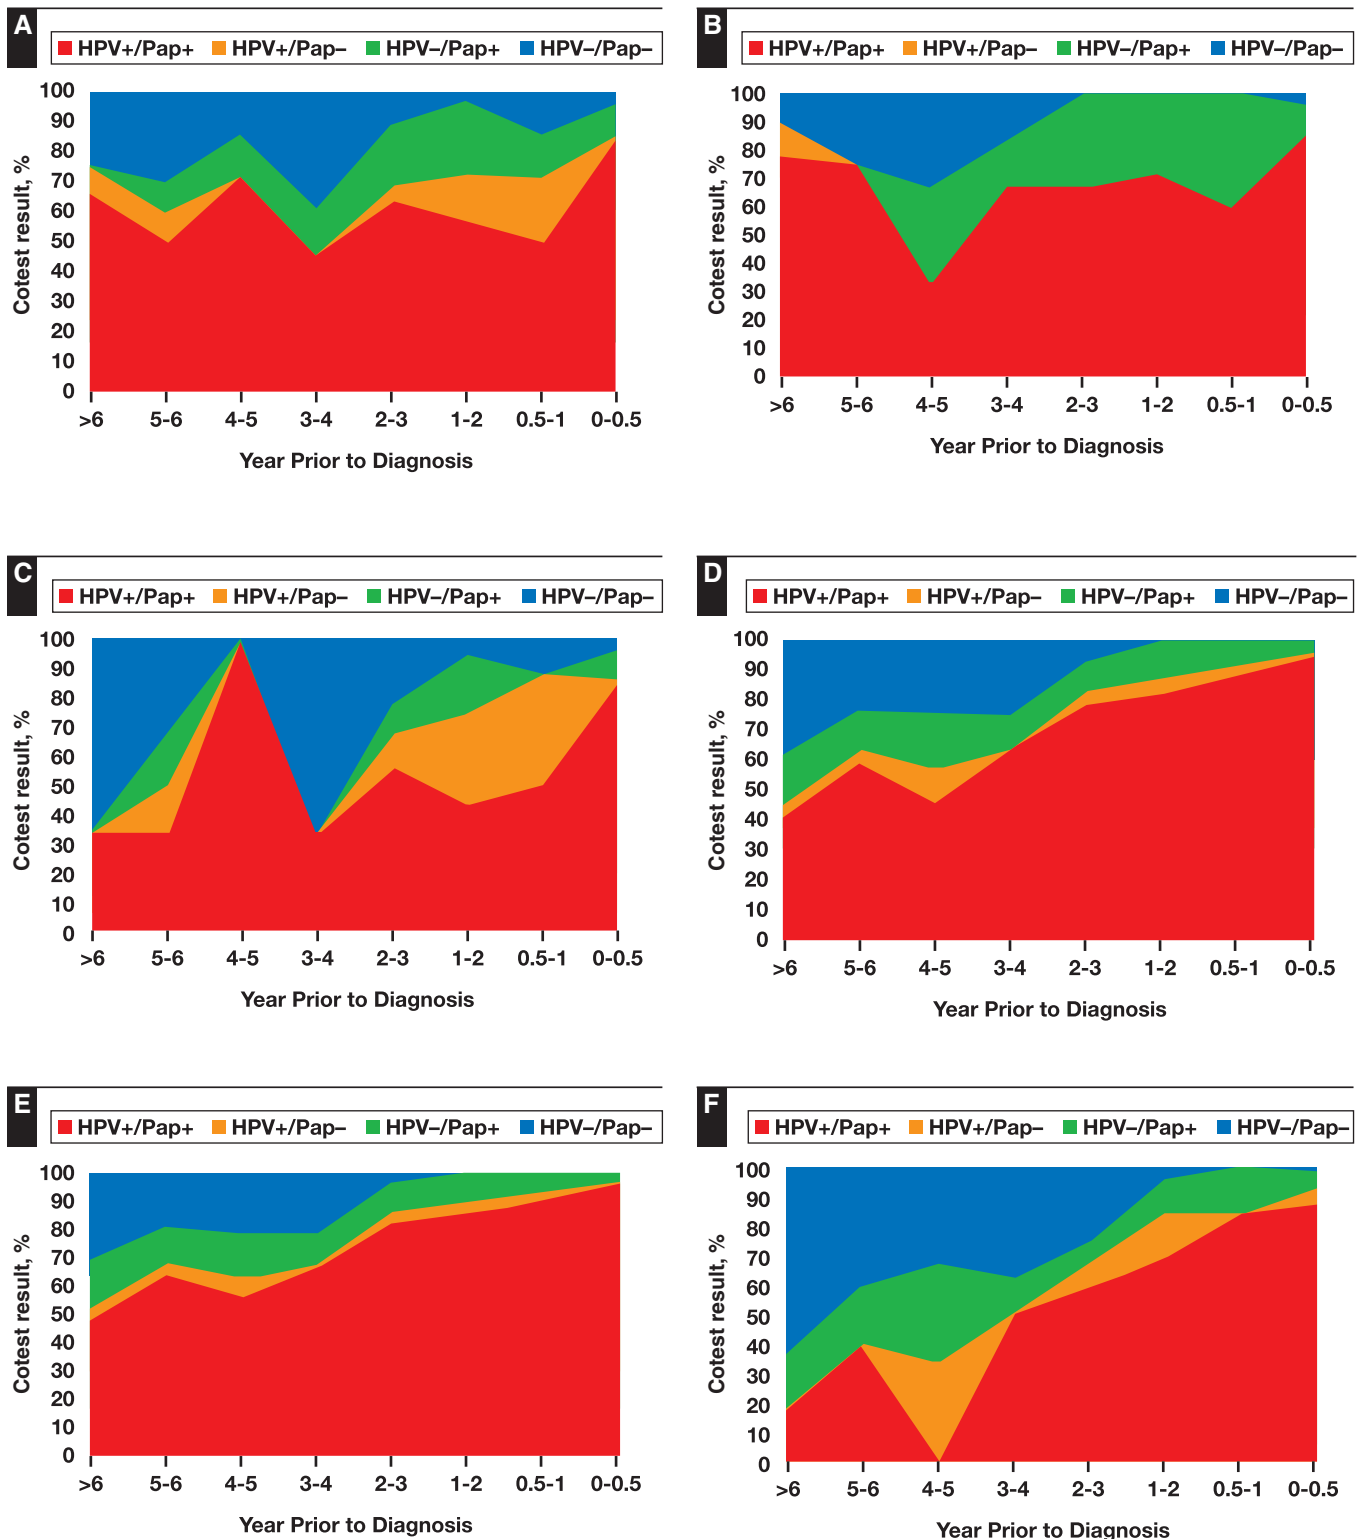

**Figure 1** Distribution of cotesting results preceding cervical invasive cancer or cervical precancer diagnoses by time period: all cervical cancers (**A**), squamous cell carcinomas (**B**), adenocarcinomas (**C**), all cervical precancers (**D**), cervical intraepithelial neoplasia 3 (**E**), and adenocarcinomas in situ (**F**). HPV, human papillomavirus; Pap, Papanicolaou test.

adenocarcinomas.<sup>38</sup> In KNPC's largest cotesting publication,<sup>6</sup> 160 of 443 (36.1%) cervical adenocarcinomas had prior HPV-positive/cytology-negative cotest results. In

contrast, only 11 of 93 (11.8%) of cervical adenocarcinomas diagnosed after MWH cotesting had prior HPV-positive/cytology-negative results (Table 1). Cervical

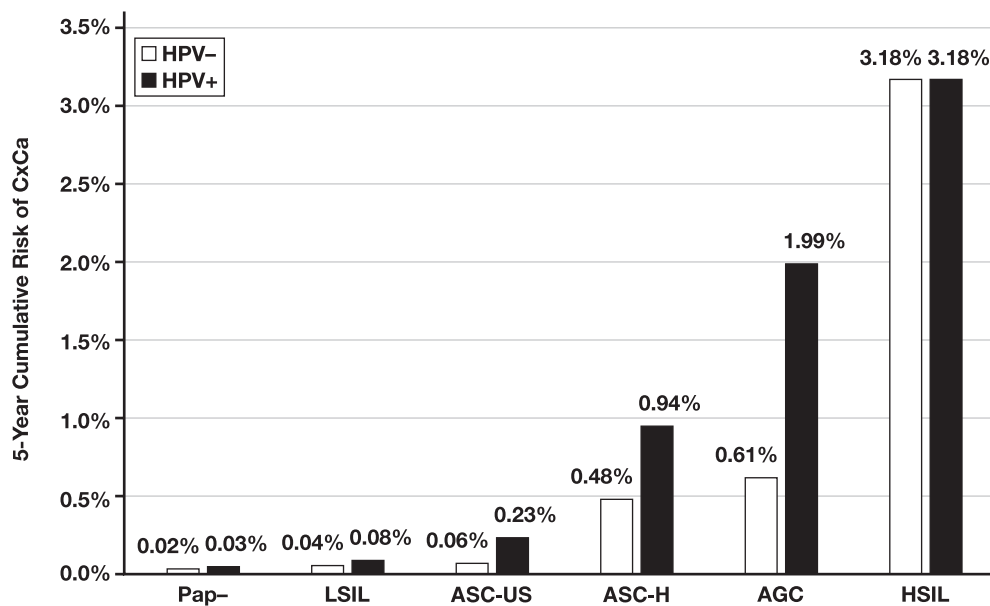

**Figure 2** The Pittsburgh Cervical Cancer Model risk assessments. AGC, atypical glandular cells; ASC-H, atypical squamous cells-cannot exclude HSIL; ASC-US, atypical squamous cells of undetermined significance; CxCa, cervical cancer; HPV, human papillomavirus; HSIL, high-grade squamous intraepithelial lesion; LSIL, low-grade squamous intraepithelial lesion; Pap, Papanicolaou test.

adenocarcinomas diagnosed after cotesting had similar HPV-positive rates at both institutions, KPNC (79.0%) and MWH (76.3%), whereas abnormal cytology rates (cytology positive) were markedly different, at KPNC (45.4%) compared to MWH (73.1%) (Table 1). Once again, local cytology performance significantly impacted the contribution of cytology to cotesting in detection of significant cervical abnormalities.

Clinical trial data exploring cervical screening options have often emphasized detection of more-prevalent CIN3 or CIN2, arguing that “the main goal of cervical screening programs is to detect precancer before cancer develops.”<sup>6</sup> However, most CIN2 lesions, particularly in young women, will spontaneously regress.<sup>39</sup> Even among women with CIN3, available long-term natural history studies of untreated disease indicate that only 30% of CIN3 lesions will progress to CxCa in 30 years.<sup>40</sup> Because most CIN2/3 lesions will not progress to CxCa, detection of these nonprogressive CIN2/3 lesions does not enhance prevention against CxCa and has been termed by some investigators as overdiagnosis.<sup>41</sup> Accordingly, it becomes even more important to assess protection against development of the much less-common endpoint of invasive cervical carcinoma. Our Bayesian modeling techniques allow long-term projections of CxCa risk while also directly reflecting local screening system data and treatment methods. Bayesian projections with the PCCSM confirm CxCa risk associated with HPV-negative

cytology-positive (abnormal) results, risk only detectable utilizing the imaged LBC cytology component of MWH cotesting (Figure 1).

Corresponding author: R. Marshall Austin MD, PhD, Dept of Pathology, University of Pittsburgh Medical Center, 300 Halket St, Pittsburgh, PA 15213; [raustin@magee.edu](mailto:raustin@magee.edu).

Acknowledgments: The authors thank Karen Lassige and Lisa Lenik for their invaluable help in retrieving data from the hospital database.

## References

1. Saslow D, Solomon D, Lawson HW, et al; ACS-ASCCP-ASCP Cervical Cancer Guideline Committee. American Cancer Society, American Society for Colposcopy and Cervical Pathology, and American Society for Clinical Pathology screening guidelines for the prevention and early detection of cervical cancer. *CA Cancer J Clin*. 2012;62:147-172.
2. Committee on Practice Bulletins—Gynecology. Practice Bulletin No. 168: Cervical cancer screening and prevention. *Obstet Gynecol*. 2016;128:e111-e130.
3. Gage JC, Schiffman M, Katki HA, et al. Reassurance against future risk of precancer and cancer conferred by a negative human papillomavirus test. *J Natl Cancer Inst*. 2014;106:pii: dju153.
4. Blatt AJ, Kennedy R, Luff RD, et al. Comparison of cervical cancer screening results among 256,648 women in multiple clinical practices. *Cancer Cytopathol*. 2015;123: 282-288.

5. Castle PE, Kinney WK, Cheung LC, et al. Why does cervical cancer occur in a state-of-the-art screening program? *Gynecol Oncol.* 2017;146:546-553.
6. Schiffman M, Kinney WK, Cheung LC, et al. Relative performance of HPV and cytology components of cotesting in cervical screening. *J Natl Cancer Inst.* 2018;110:501-508.
7. Katki HA, Schiffman M, Castle PE, et al. Five-year risks of CIN 3+ and cervical cancer among women with HPV-positive and HPV-negative high-grade Pap results. *J Low Genit Tract Dis.* 2013;17:S50-S55.
8. US Department of Health and Human Services, Food and Drug Administration. *Guidance for Industry and Food and Drug Administration Staff: Establishing the Performance Characteristics of In Vitro Diagnostic Devices for the Detection or Detection and Differentiation of Human Papillomaviruses.* Rockville, MD: Food and Drug Administration; 2011.
9. Lee KR, Ashfaq R, Birdsong GG, et al. Comparison of conventional Papanicolaou smears and a fluid-based, thin-layer system for cervical cancer screening. *Obstet Gynecol.* 1997;90:278-284.
10. Davey E, d'Assuncao J, Irwig L, et al. Accuracy of reading liquid based cytology slides using the ThinPrep imager compared with conventional cytology: prospective study. *BMJ.* 2007;335:31.
11. Terry G, Ho L, Londesborough P, et al. Detection of high-risk HPV types by the Hybrid Capture 2 test. *J Med Virol.* 2001;65:155-162.
12. Einstein MH, Martens MG, Garcia FA, et al. Clinical validation of the Cervista HPV HR and 16/18 genotyping tests for use in women with ASC-US cytology. *Gynecol Oncol.* 2010;118:116-122.
13. Iftner T, Becker S, Neis KJ, et al. Head-to-head comparison of the RNA-based Aptima human papillomavirus (HPV) assay and the DNA-based Hybrid Capture 2 HPV test in a routine screening population of women aged 30 to 60 years in Germany. *J Clin Microbiol.* 2015;53:2509-2516.
14. Solomon D, Davey D, Kurman R, et al.; Forum Group Members; Bethesda 2001 Workshop. The 2001 Bethesda System: terminology for reporting results of cervical cytology. *JAMA.* 2002;287:2114-2119.
15. Austin RM, Onisko A, Druzdel MJ. The Pittsburgh Cervical Cancer Screening Model: a risk assessment tool. *Arch Pathol Lab Med.* 2010;134:744-750.
16. Onisko A, Austin RM. Dynamic Bayesian network for cervical cancer screening. In: Lucas PJF, Hommersom A, eds. *Foundations of Biomedical Knowledge Representations, Methods and Applications, Lecture Notes on Artificial Intelligence.* Basel, Switzerland: Springer International Publishing; 2015:207-218.
17. Austin RM, Onisko A, Druzdel MJ. Increased cervical cancer risk associated with extended screening intervals after negative human papilloma virus (HPV) test results: Bayesian risk estimates using the Pittsburgh Cervical Cancer Screening Model. *J Am Soc Cytopathol.* 2016;5:9-14.
18. Onisko A, Druzdel MJ, Austin RM. How to interpret the results of medical time series data analysis: classical statistical approaches versus dynamic Bayesian network modeling. *J Pathol Inform.* 2016;7:50.
19. Bernstein SJ, Sanchez-Ramos L, Ndubisi B. Liquid-based cervical cytologic smear study and conventional Papanicolaou smears: a metaanalysis of prospective studies comparing cytologic diagnosis and sample adequacy. *Am J Obstet Gynecol.* 2001;185:308-317.
20. Abulafia O, Pezzullo JC, Sherer DM. Performance of ThinPrep liquid-based cervical cytology in comparison with conventionally prepared Papanicolaou smears: a quantitative survey. *Gynecol Oncol.* 2003;90:137-144.
21. Nance KV. Evolution of Pap testing at a community hospital: a ten year experience. *Diagn Cytopathol.* 2007;35:148-153.
22. Tao X, Austin RM, Zhang H, et al. Pap test reporting rates for conventional smear and liquid-based cervical cytology from the largest academic women's hospital in China: analysis of 1,248,785 Pap test reports. *Acta Cytol.* 2015;59:445-451.
23. Zheng B, Austin RM, Liang X, et al. Bethesda system reporting rates for conventional Papanicolaou tests and liquid-based cytology in a large Chinese, College of American Pathologists-certified independent medical laboratory: analysis of 1394389 Papanicolaou test reports. *Arch Pathol Lab Med.* 2015;139:373-377.
24. Hutchinson ML, Isenstein LM, Goodman A, et al. Homogeneous sampling accounts for the increased diagnostic accuracy using the ThinPrep processor. *Am J Clin Pathol.* 1994;101:215-219.
25. Ronco G, Cuzick J, Pierotti P, et al. Accuracy of liquid based versus conventional cytology: overall results of new technologies for cervical cancer screening: randomised controlled trial. *BMJ.* 2007;335:28.
26. Siebers AG, Klinkhamer PJ, Grefte JM, et al. Comparison of liquid-based cytology with conventional cytology for detection of cervical cancer precursors: a randomized controlled trial. *JAMA.* 2009;302:1757-1764.
27. Kitchener HC, Almonte M, Gilham C, et al; ARTISTIC Trial Study Group. ARTISTIC: a randomised trial of human papillomavirus (HPV) testing in primary cervical screening. *Health Technol Assess.* 2009;13:1-150, iii-iv.
28. Ronco G, Dillner J, Elfström KM, et al; International HPV Screening Working Group. Efficacy of HPV-based screening for prevention of invasive cervical cancer: follow-up of four European randomised controlled trials. *Lancet.* 2014;383:524-532.
29. Kinney W, Wright TC, Dinkelspiel HE, et al. Increased cervical cancer risk associated with screening at longer intervals. *Obstet Gynecol.* 2015;125:311-315.
30. Stoler MH, Austin RM, Zhao C. Point-counterpoint: cervical cancer screening should be done by primary human papillomavirus testing with genotyping and reflex cytology for women over the age of 25 years. *J Clin Microbiol.* 2015;53:2798-2804.
31. Dijkstra MG, van Zummeren M, Rozendaal L, et al. Safety of extending screening intervals beyond five years in cervical screening programmes with testing for high risk human papillomavirus: 14 year follow-up of population based randomised cohort in the Netherlands. *BMJ.* 2016;355:i4924.
32. Castle PE, Kinney WK, Xue X, et al. Effect of several negative rounds of human papillomavirus and cytology co-testing on safety against cervical cancer: an observational cohort study. *Ann Intern Med.* 2018;168:20-29.
33. Zhao C, Florea A, Onisko A, et al. Histologic follow-up results in 662 patients with Pap test findings of atypical glandular cells: results from a large academic womens hospital laboratory employing sensitive screening methods. *Gynecol Oncol.* 2009;114:383-389.

34. Wright TC Jr, Stoler MH, Behrens CM, et al. Interlaboratory variation in the performance of liquid-based cytology: insights from the ATHENA trial. *Int J Cancer*. 2014;134:1835-1843.
35. Austin RM, Zhao C. Observations from Pap litigation consultations. *Pathol Case Rev*. 2011;16:73-82.
36. Castanon A, Ferryman S, Patnick J, et al. Review of cytology and histopathology as part of the NHS cervical screening programme audit of invasive cervical cancers. *Cytopathology*. 2012;23:13-22.
37. International Collaboration of Epidemiological Studies of Cervical Cancer. Comparison of risk factors for invasive squamous cell carcinoma and adenocarcinoma of the cervix: collaborative reanalysis of individual data on 8,097 women with squamous cell carcinoma and 1,374 women with adenocarcinoma from 12 epidemiological studies. *Int J Cancer*. 2007;120:885-891.
38. Kinney W, Fetterman B, Cox JT, et al. Characteristics of 44 cervical cancers diagnosed following Pap-negative, high risk HPV-positive screening in routine clinical practice. *Gynecol Oncol*. 2011;121:309-313.
39. Tainio K, Athanasiou A, Tikkinen KAO, et al. Clinical course of untreated cervical intraepithelial neoplasia grade 2 under active surveillance: systematic review and meta-analysis. *BMJ*. 2018;360:k499.
40. McCredie MR, Sharples KJ, Paul C, et al. Natural history of cervical neoplasia and risk of invasive cancer in women with cervical intraepithelial neoplasia 3: a retrospective cohort study. *Lancet Oncol*. 2008;9:425-434.
41. Malila N, Leinonen M, Kotaniemi-Talonen L, et al. The HPV test has similar sensitivity but more overdiagnosis than the Pap test—a randomised health services study on cervical cancer screening in Finland. *Int J Cancer*. 2013;132:2141-2147.



# First and Only FDA Cleared Digital Cytology System

**Genius™ Cervical AI**

**Genius™ Review Station**

**Genius™ Digital Imager**

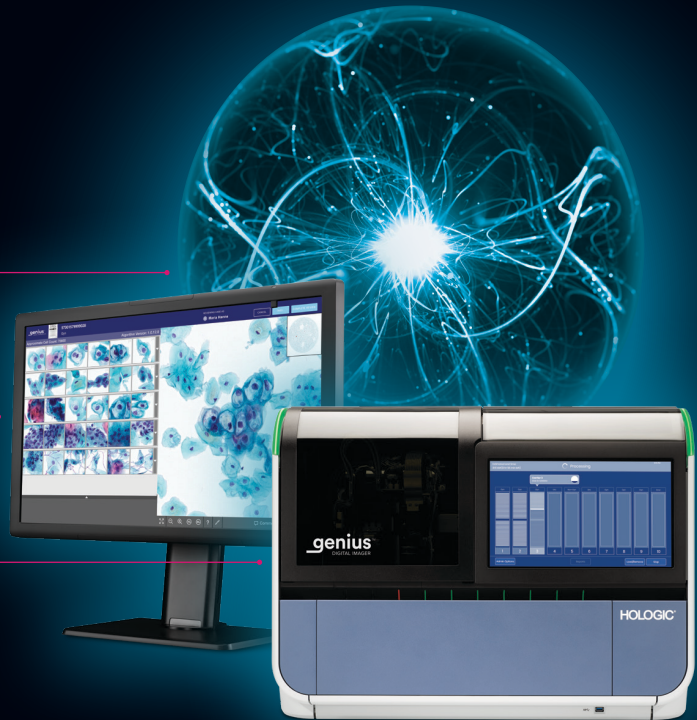

## Empower Your Genius With Ours

**Make a Greater Impact on Cervical Cancer**  
with the Advanced Technology of the  
Genius™ Digital Diagnostics System

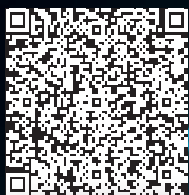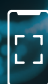

Click or Scan  
to discover more

ADS-04159-001 Rev 001 © 2024 Hologic, Inc. All rights reserved. Hologic, Genius, and associated logos are trademarks and/or registered trademarks of Hologic, Inc. and/or its subsidiaries in the United States and/or other countries. This information is intended for medical professionals in the U.S. and other markets and is not intended as a product solicitation or promotion where such activities are prohibited. Because Hologic materials are distributed through websites, podcasts and tradeshows, it is not always possible to control where such materials appear. For specific information on what products are available for sale in a particular country, please contact your Hologic representative or write to [diagnostic.solutions@hologic.com](mailto:diagnostic.solutions@hologic.com).

**genius™**  
DIGITAL DIAGNOSTICS
